# Supplementary material for: Comparative Analysis of In Situ Eukaryotic Food Sources in Three Tropical Sea Cucumber Species by Metabarcoding
Source: MDPI journal article supplement (doi:10.3390/ani12172303), 2022-09-05
Supplement: s1 [file s1]

**Table S1.** OTUs whose abundance exceeded 1 % but less than 10 % in single gut samples.

| OTU      | Phylum       | Class                | Species                                                                                | Sample ID <sup>1</sup> |
|----------|--------------|----------------------|----------------------------------------------------------------------------------------|------------------------|
| OTU_2405 | Arthropoda   | Maxillopoda          | <i>Acartia pacifica</i>                                                                | Sc3                    |
| OTU_2067 | Annelida     | Polychaeta           | <i>Spio</i> sp. LK-2011-1                                                              | Sc3                    |
| OTU_72   | Chlorophyta  | Unidentified         | <i>Chlorophyta</i> sp.CCMP1220                                                         | Sc4                    |
| OTU_37   | Streptophyta | Unidentified         | <i>Lactuca sativa</i>                                                                  | Sc4                    |
| OTU_740  | Phaeophyceae | Unidentified         | <i>Lobophora variegata</i>                                                             | Sc5                    |
| OTU_530  | Apicomplexa  | Unidentified         | <i>Gregarinasina</i> gen. sp. 4<br>KCW-2013                                            | Sc5                    |
| OUT_2919 | Diatomea     | Bacillariophyceae    | <i>Psammodyctyon constrictum</i>                                                       | Sc1                    |
|          |              |                      |                                                                                        | Sc3                    |
|          |              |                      |                                                                                        | Sc4                    |
|          |              |                      |                                                                                        | Ha3                    |
|          |              |                      |                                                                                        | Ha4                    |
| OTU_36   | Chlorophyta  | Ulvophyceae          | <i>Parvocaulis parvulus</i>                                                            | Ha5                    |
|          |              |                      |                                                                                        | Sc1                    |
|          |              |                      |                                                                                        | Ha3                    |
| OTU_316  | Eukaryota    | Dinophyceae          | <i>Symbiodinium</i> sp. Strain<br>Kenting E                                            | Ha4                    |
|          |              |                      |                                                                                        | Sc5                    |
| OTU_2238 | Apicomplexa  | <i>Gregarinasina</i> | <i>Gregarinidae</i> sp. from<br><i>Phyllochaetopterus</i><br><i>prolifera</i> SR-2009a | Ha5                    |
|          |              |                      |                                                                                        | Sc5                    |
|          |              |                      |                                                                                        | Ha2                    |
|          |              |                      |                                                                                        | Ha3                    |
| OTU_1443 | Eukaryota    | Dinophyceae          | <i>Symbiodinium</i> sp.                                                                | Ha5                    |
|          |              |                      |                                                                                        | Sc1                    |
|          |              |                      |                                                                                        | Sc2                    |
|          |              |                      |                                                                                        | Sc3                    |
|          |              |                      |                                                                                        | Sc4                    |
|          |              |                      |                                                                                        | Sc5                    |
|          |              |                      |                                                                                        | Ha1                    |
|          |              |                      |                                                                                        | Ha2                    |
| OTU_73   | Eukaryota    | Unidentified         | <i>Chromerida</i> sp. RM11                                                             | Ha3                    |
|          |              |                      |                                                                                        | Ha5                    |
|          |              |                      |                                                                                        | Sc1                    |
|          |              |                      |                                                                                        | Sc2                    |
|          |              |                      |                                                                                        | Sc4                    |
|          |              |                      |                                                                                        | Sc5                    |
| OTU_1048 | Eukaryota    | Dinophyceae          | <i>Symbiodinium</i> sp. Clade C                                                        | Ha2                    |
|          |              |                      |                                                                                        | Ha3                    |
|          |              |                      |                                                                                        | Ha4                    |
|          |              |                      |                                                                                        | Ha5                    |
|          |              |                      |                                                                                        | Sc1                    |
|          |              |                      |                                                                                        | Sc3                    |
| OTU_909  | Chlorophyta  | Unidentified         | <i>Prasinophyte</i> sp. RCC856                                                         | Sc4                    |
|          |              |                      |                                                                                        | Sc5                    |

|          |              |               |                                                   |     |
|----------|--------------|---------------|---------------------------------------------------|-----|
|          |              |               |                                                   | Sc4 |
|          |              |               |                                                   | Ha1 |
| OTU_2765 | Eukaryota    | Unidentified  | <i>Karlodinium veneficum</i>                      | Ha3 |
|          |              |               |                                                   | Ha5 |
| OTU_89   | Apicomplexa  | Gregarinasina | <i>Selenidium pendula</i>                         | Ha1 |
| OTU_85   | Arthropoda   | Arachnida     | <i>Rhombognathus levigatoides</i>                 | Ha5 |
|          |              |               |                                                   | Sm1 |
| OTU_790  | Eukaryota    | Dinophyceae   | <i>Amphidinium</i> sp. FA1-<br>CMSTAC022          | Sm2 |
|          |              |               |                                                   | Sm5 |
|          |              |               |                                                   | Ha3 |
|          |              |               |                                                   | Sm3 |
| OTU_1970 | Phaeophyceae | Unidentified  | <i>Sphacelaria</i> sp. UTEX LB<br>800             | Sc2 |
|          |              |               |                                                   | Sc5 |
|          |              |               |                                                   | Ha1 |
| OTU_74   | Eukaryota    | Dinophyceae   | <i>Amphidinium</i> sp. D1-<br>CMSTAC020           | Sm1 |
|          |              |               |                                                   | Sm5 |
| OTU_102  | Eukaryota    | Dinophyceae   | <i>Amphidinium</i> sp. FC2-<br>CMSTAC023          | Sm1 |
|          |              |               |                                                   |     |
| OTU_2568 | Arthropoda   | Ostracoda     | <i>Hemicytherura kajiymai</i>                     | Sm1 |
|          |              |               |                                                   | Sm3 |
| OTU_75   | Apicomplexa  | Gregarinasina | <i>Lankesteria cystodytae</i>                     | Sm3 |
| OTU_110  | Mollusca     | Gastropoda    | <i>Clypeomorus brevis</i>                         | Sm3 |
|          |              |               |                                                   |     |
| OTU_2305 | Arthropoda   | Maxillopoda   | <i>Scambicornus</i> sp. New<br>Caledonia-RJH-2004 | Sm3 |
| OTU_6    | Arthropoda   | Ostracoda     | <i>Loxocorniculum mutsuense</i>                   | Sm3 |

1: Sm (*S. monotuberculatus*), Sc (*S. chloronotus*), Ha (*H. atra*)
