# Supplementary figures and images for: Comparative Analysis of In Situ Eukaryotic Food Sources in Three Tropical Sea Cucumber Species by Metabarcoding
Source: MDPI journal article supplement (doi:10.3390/ani12172303), 2022-09-05

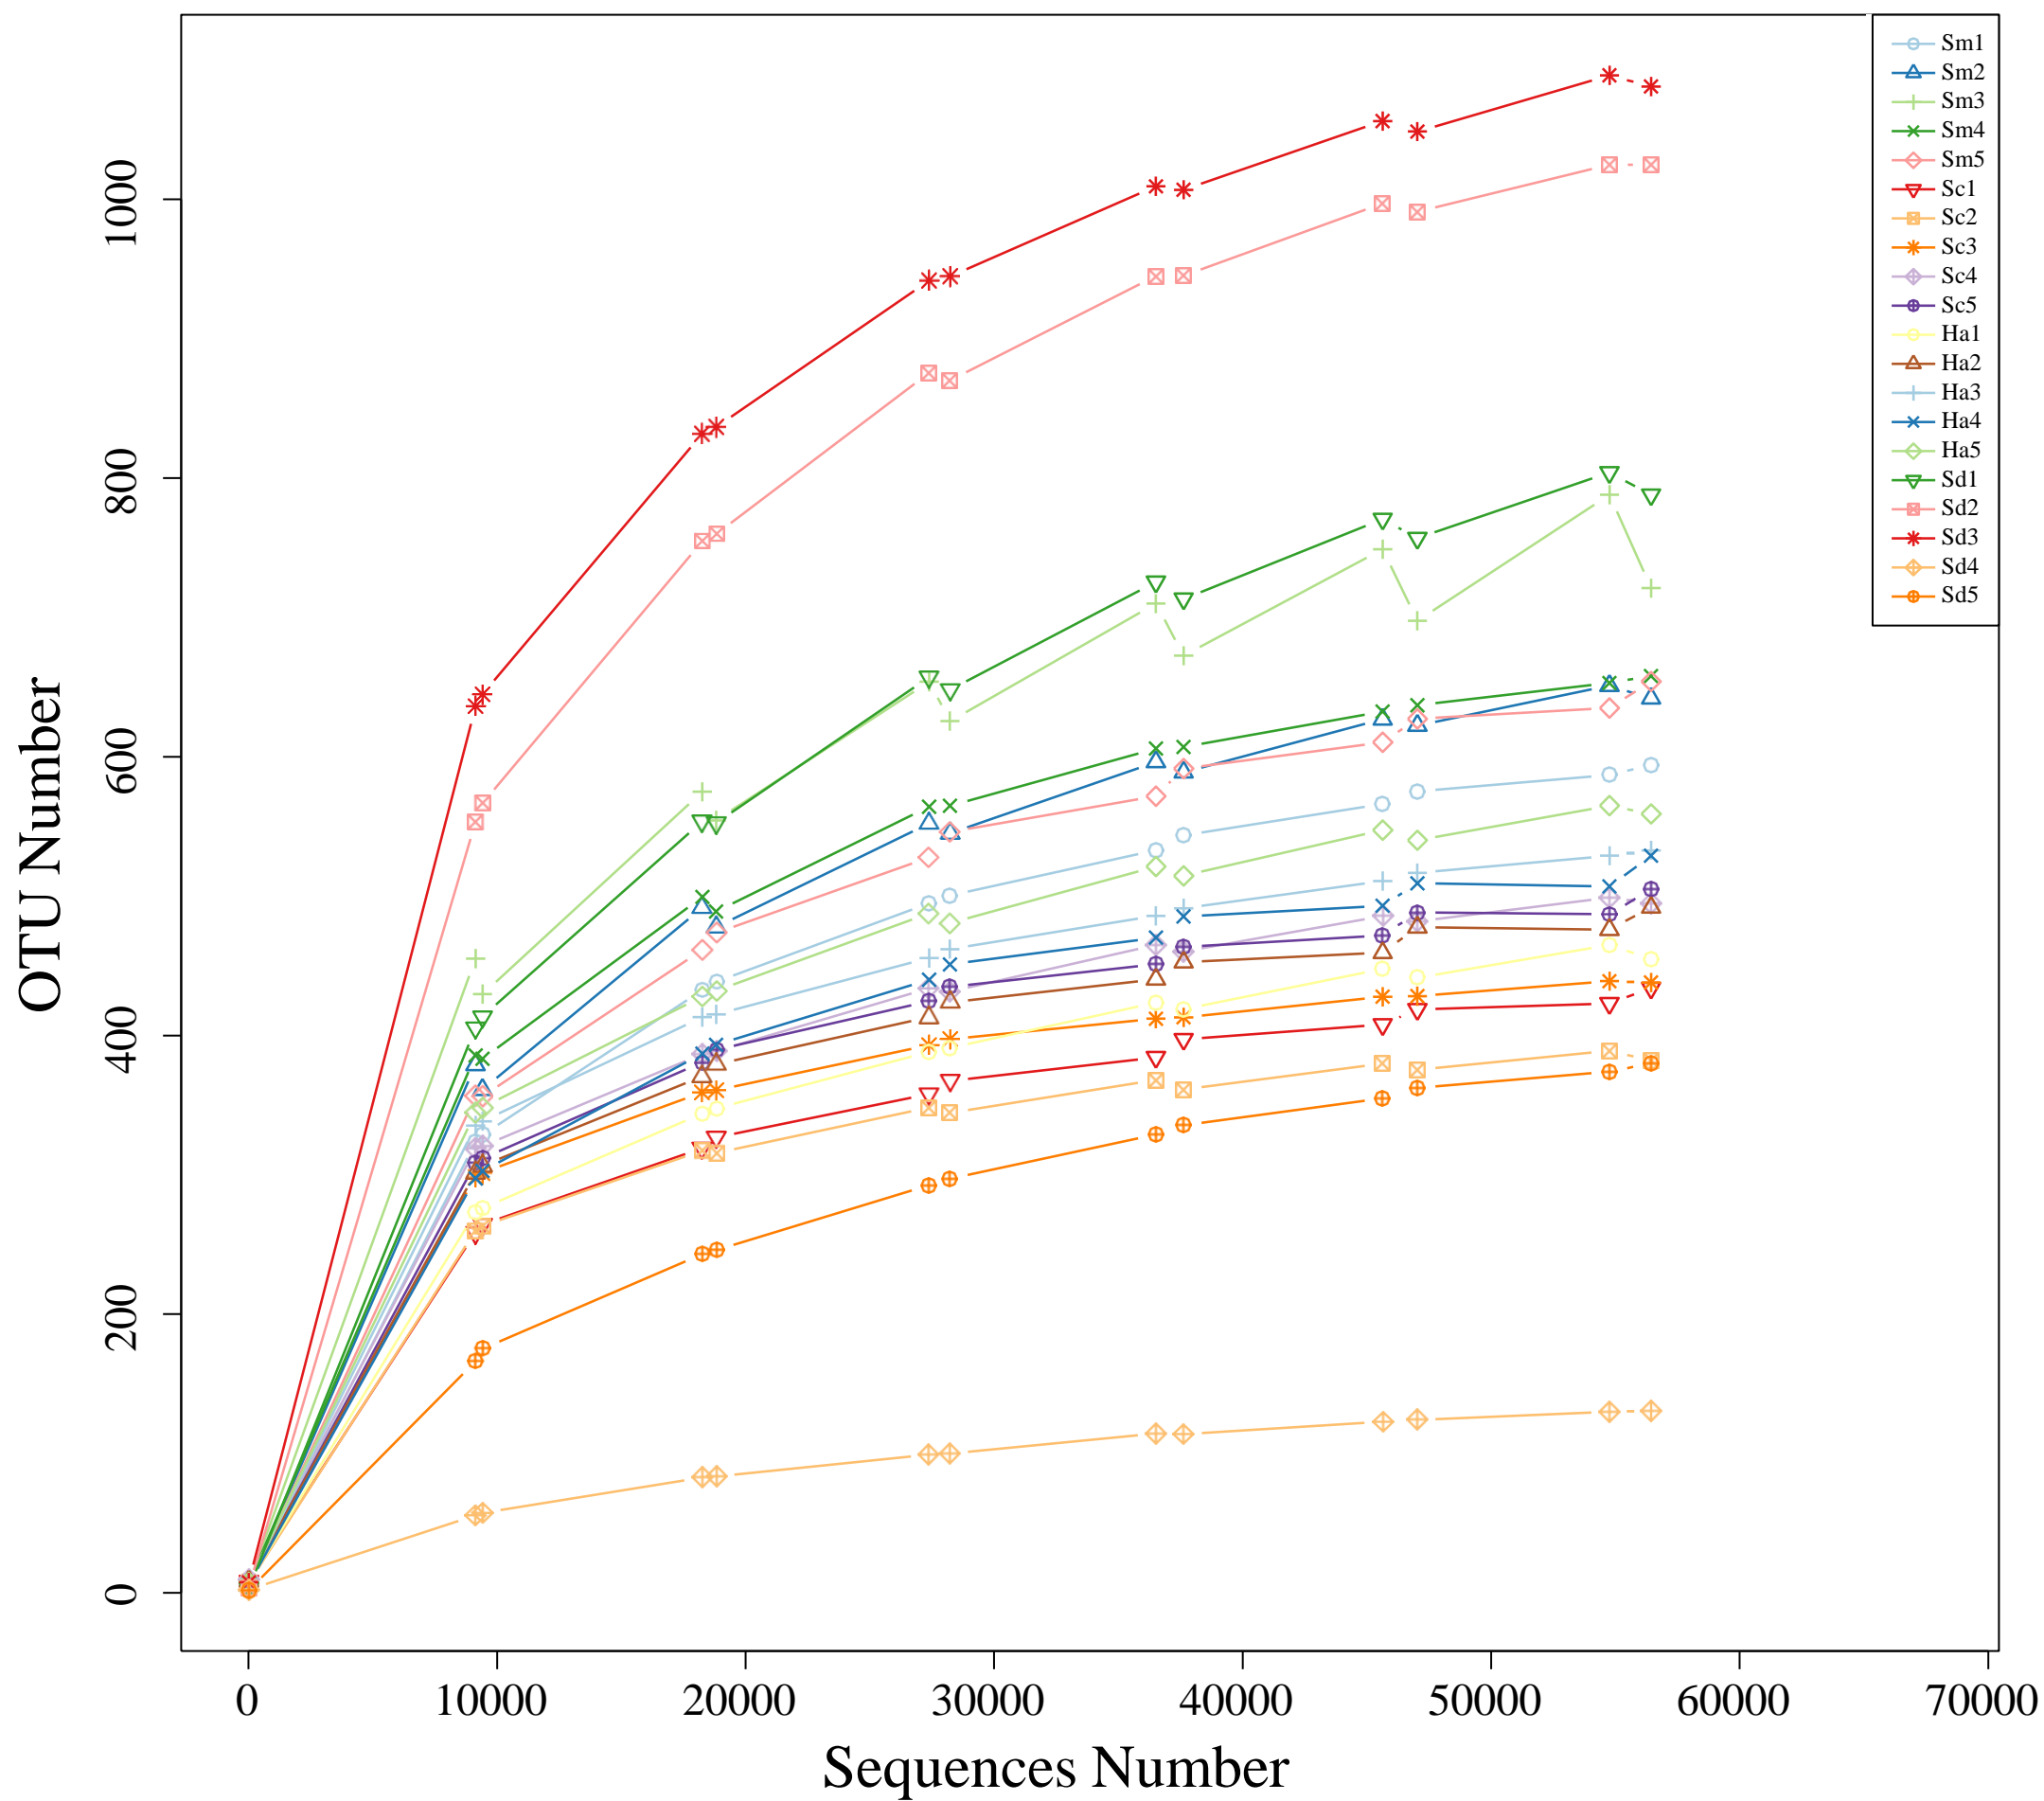

Supplement: s1 [file s1]
